# Supplementary material for: Exfoliation and Stability Studies of Germanane and its Derivatives
Source: MDPI journal article supplement (doi:10.3390/genes13071205), 2014-11-01
Supplement: s1 [file s1]

Supplementary Table S1. The list of differentially expressed genes of interest analyzed in study. Quantitative data are presented as LogFC. All of the presented sample means were deemed to be statistically significant ( $p < 0.05$ ).

| RA               |                  |                  |                  |                  |                  | Gen<br>e<br>sym<br>bol | RAA              |                  |                  |                  |                  |                  |
|------------------|------------------|------------------|------------------|------------------|------------------|------------------------|------------------|------------------|------------------|------------------|------------------|------------------|
| Microarray       |                  |                  | RT-qPCR          |                  |                  |                        | Microarray       |                  |                  | RT-qPCR          |                  |                  |
| 7D               | 15D              | 30D              | 7D               | 15D              | 30D              |                        | 7D               | 15D              | 30D              | 7D               | 15D              | 30D              |
| 6,25<br>3242     | 5,85<br>3737     | 5,53<br>6136     | 8,39<br>1706     | 7,43<br>1329     | 8,00<br>6441     | ITGA<br>8              | 4,78<br>7222     | 6,30<br>6512     | 6,56<br>1438     | 3,35<br>0128     | 6,09<br>5644     | 8,22<br>4495     |
| 4,76<br>775      | 5,76<br>1723     | 5,91<br>9576     | 9,44<br>1706     | 10,3<br>1633     | 10,8<br>4144     | TNC                    | 5,98<br>2169     | 6,26<br>8045     | 5,85<br>3354     | 10,3<br>7513     | 9,41<br>0644     | 9,59<br>4495     |
| 5,70<br>7601     | 5,92<br>4523     | 6,04<br>3659     | 3,47<br>6706     | 4,16<br>6329     | 4,62<br>6441     | FGF7                   | 4,67<br>3334     | 3,99<br>9197     | 4,78<br>6114     | 3,08<br>5128     | 1,54<br>5644     | 4,53<br>4495     |
| 4,90<br>1422     | 5,15<br>2612     | 4,72<br>3275     | 4,28<br>1706     | 5,15<br>1329     | 4,26<br>6441     | COL<br>12A<br>1        | 5,00<br>208      | 5,07<br>1971     | 4,86<br>3656     | 4,69<br>5128     | 4,28<br>5644     | 5,69<br>9495     |
| 2,96<br>9907     | 2,87<br>327      | 1,63<br>3909     | 1,08<br>6706     | 1,79<br>6329     | 0,43<br>6441     | KIF2<br>3              | 4,99<br>3154     | 3,37<br>2186     | 0,12<br>8094     | 3,44<br>5128     | 1,48<br>5644     | 0,76<br>9495     |
| 2,85<br>6535     | 2,94<br>045      | 2,62<br>7044     | 0,67<br>6706     | 0,49<br>6329     | 0,49<br>6441     | FLNB                   | 2,44<br>8947     | 2,84<br>1917     | 2,47<br>5555     | 0,29<br>0128     | 0,25<br>0644     | 1,31<br>4495     |
| 3,34<br>0376     | 3,37<br>4572     | 2,94<br>8261     | 3,59<br>1706     | 4,60<br>1329     | 4,61<br>1441     | COL<br>5A2             | 1,49<br>4016     | 1,97<br>5676     | 3,00<br>4599     | 1,83<br>0128     | 2,08<br>0644     | 4,30<br>4495     |
| 1,57<br>5923     | 2,07<br>2305     | 1,85<br>3256     | 0,74<br>1706     | 2,37<br>6329     | 0,25<br>1441     | COL<br>8A1             | 2,45<br>8097     | 3,63<br>5923     | 4,01<br>7934     | 0,51<br>5128     | 2,07<br>5644     | 3,13<br>4495     |
| 3,13<br>1964     | 3,06<br>4496     | 3,31<br>7055     | 0,47<br>6706     | 0,93<br>6329     | 1,17<br>1441     | MYO<br>5A              | 3,47<br>8163     | 3,52<br>8242     | 3,35<br>9156     | 1,62<br>5128     | 0,59<br>5644     | 0,71<br>4495     |
| 2,25<br>9761     | 2,56<br>381      | 2,08<br>2945     | 2,04<br>6706     | 2,52<br>1329     | 1,46<br>1441     | TRA<br>M1              | 2,55<br>6084     | 2,43<br>4098     | 2,24<br>4343     | 1,02<br>5128     | 0,87<br>0644     | 1,85<br>4495     |
| 2,75<br>3255     | 2,52<br>1996     | 2,19<br>0241     | 2,33<br>1706     | 2,39<br>1329     | 1,76<br>1441     | TRA<br>M2              | 2,63<br>0927     | 2,40<br>5767     | 2,59<br>1958     | 2,67<br>0128     | 1,49<br>5644     | 2,08<br>9495     |
| -<br>7,88<br>478 | -<br>7,66<br>408 | -<br>7,75<br>335 | -<br>6,59<br>329 | -<br>5,88<br>867 | -<br>8,89<br>856 | DM<br>D                | -<br>7,22<br>937 | -<br>7,12<br>063 | -<br>7,21<br>656 | -<br>5,37<br>487 | -<br>8,25<br>436 | -<br>6,20<br>05  |
| -<br>6,07<br>981 | -<br>5,47<br>965 | -<br>6,76<br>34  | -<br>8,48<br>829 | -<br>7,80<br>867 | -<br>10,1<br>786 | ABLI<br>M1             | -<br>4,27<br>699 | -<br>4,43<br>479 | -<br>6,56<br>139 | -<br>7,74<br>987 | -<br>7,83<br>436 | -<br>13,1<br>555 |
| -<br>5,19<br>431 | -<br>6,17<br>242 | -<br>6,59<br>799 | -<br>7,01<br>829 | -<br>5,74<br>867 | -<br>6,36<br>356 | CAS<br>Q2              | -<br>4,33<br>827 | -<br>5,71<br>231 | -<br>7,09<br>292 | -<br>6,80<br>487 | -<br>7,40<br>436 | -<br>9,95<br>05  |

|      |      |      |      |      |      |                           |      |      |      |      |      |      |
|------|------|------|------|------|------|---------------------------|------|------|------|------|------|------|
| -    | -    | -    | -    | -    | -    | <i>TMO</i><br><i>D1</i>   | -    | -    | -    | -    | -    | -    |
| 3,25 | 3,03 | 2,13 | 6,92 | 5,33 | 2,85 |                           | 3,61 | 2,99 | 2,43 | 7,85 | 4,65 | 4,67 |
| 689  | 953  | 379  | 329  | 867  | 856  |                           | 724  | 637  | 032  | 487  | 936  | 05   |
| -    | -    | -    | -    | -    | -    | <i>XIRP</i><br><i>1</i>   | -    | -    | -    | -    | -    | -    |
| 2,68 | 2,75 | 2,63 | 8,38 | 6,61 | 6,63 |                           | 2,54 | 3,15 | 3,62 | 4,94 | 6,07 | 6,38 |
| 465  | 528  | 948  | 829  | 867  | 856  |                           | 262  | 319  | 817  | 987  | 936  | 55   |
| -    | -    | -    | -    | -    | -    | <i>PHA</i><br><i>CTR1</i> | -    | -    | -    | -    | -    | -    |
| 2,59 | 3,36 | 3,30 | 6,48 | 6,84 | 5,06 |                           | 6,38 | 6,60 | 5,65 | 5,25 | 5,99 | 4,66 |
| 72   | 26   | 264  | 329  | 367  | 356  |                           | 54   | 626  | 683  | 487  | 436  | 55   |
| -    | -    | -    | -    | -    | -    | <i>MAT</i><br><i>N2</i>   | -    | -    | -    | -    | -    | -    |
| 3,43 | 3,42 | 3,80 | 8,67 | 8,44 | 10,5 |                           | 3,47 | 4,50 | 4,39 | 7,41 | 10,1 | 8,13 |
| 41   | 236  | 538  | 329  | 367  | 136  |                           | 929  | 319  | 175  | 487  | 044  | 05   |
| -    | -    | -    | -    | -    | -    | <i>VWF</i>                | -    | -    | -    | -    | -    | -    |
| 2,97 | 2,25 | 3,00 | 6,98 | 5,15 | 6,13 |                           | 3,52 | 2,86 | 3,53 | 6,21 | 5,48 | 3,80 |
| 284  | 717  | 174  | 329  | 367  | 356  |                           | 197  | 318  | 66   | 987  | 936  | 05   |
| -    | -    | -    | -    | -    | -    | <i>ITGB</i><br><i>6</i>   | -    | -    | -    | -    | -    | -    |
| 2,51 | 2,31 | 2,34 | 6,90 | 7,68 | 8,15 |                           | 2,95 | 3,04 | 2,75 | 7,36 | 7,23 | 5,45 |
| 456  | 502  | 237  | 829  | 867  | 856  |                           | 086  | 253  | 749  | 987  | 936  | 05   |

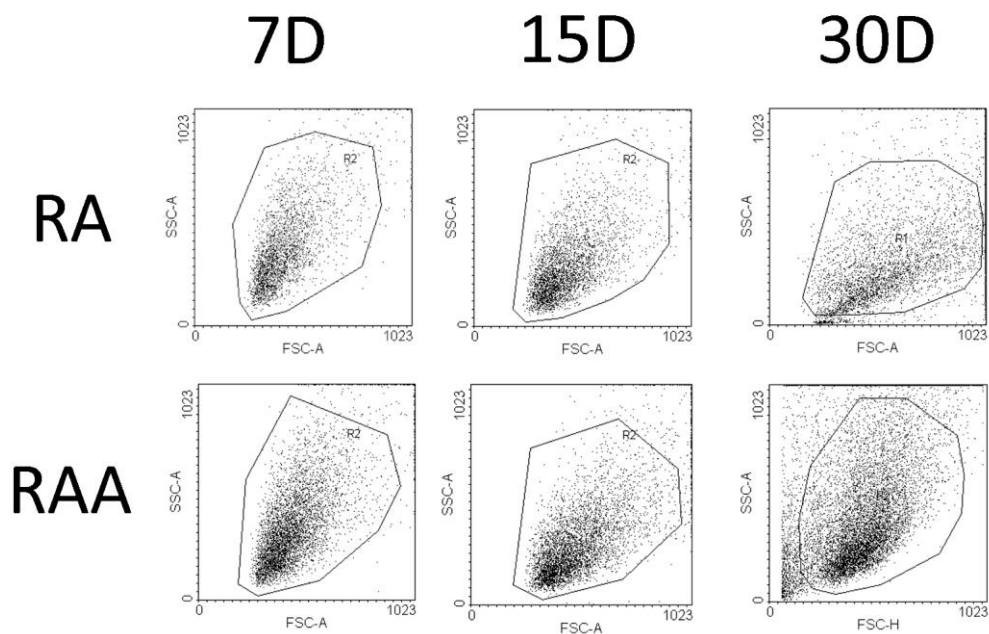

Figure S1: The flow cytometry gating strategy.

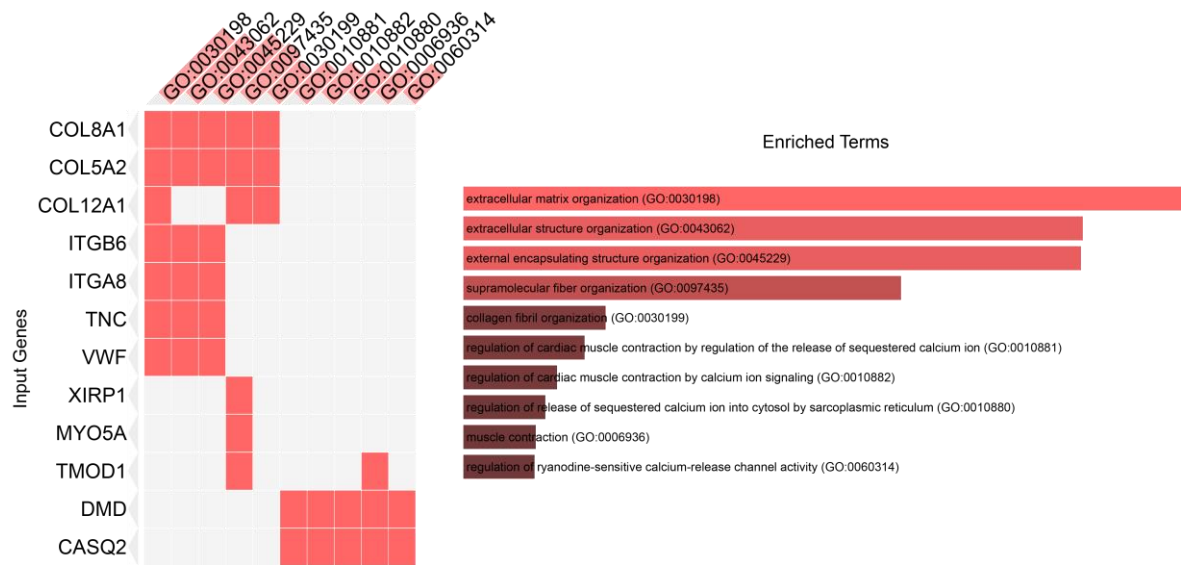

Figure S2: Enrichment analysis. In the clustergram, enriched GO terms are the columns, input genes are the rows, and cells in the matrix indicate if a gene is associated with a term.
